# Supplementary material
Source: publisher site journal article supplement (https://www.spandidos-publications.com/7339/downloadSupplementary)
Supplement: Supplementary file 1 [file downloadSupplementary]

**Table SI.** Clinical trials about flavonoids combined with cancer immunotherapy.

| <b>Registration no.</b> | <b>Intervention</b> | <b>Immunotherapy</b>                                     | <b>Disease</b>                        | <b>Status</b> | <b>Phase</b> |
|-------------------------|---------------------|----------------------------------------------------------|---------------------------------------|---------------|--------------|
| NCT05724329             | Quercetin           | Tislelizumab                                             | Head and neck squamous cell carcinoma | Active        | II           |
| NCT06049576             | Camu Camu           | Nivolumab and ipilimumab                                 | Metastatic renal cell carcinoma       | Recruiting    | I            |
| NCT06236360             | Mediterranean Diet  | Anti-programmed death-1 + anti-cytotoxic T lymphocyte A4 | Metastatic melanoma                   | Recruiting    | -            |
